# Supplementary material for: Interpretable Machine Learning Model Predicting Early Neurological Deterioration in Ischemic Stroke Patients Treated with Mechanical Thrombectomy: A Retrospective Study
Source: MDPI journal article supplement (doi:10.3390/brainsci13040557), 2023-03-26
Supplement: s1 [file s1]

**Supplement Table S1. Demographics and clinical characteristics of external validation set**

| Variables                                                         | All patients, n = 233 | With END, n = 56   | Without END, n = 177 |
|-------------------------------------------------------------------|-----------------------|--------------------|----------------------|
| <b>Demographic characteristics</b>                                |                       |                    |                      |
| Age, years, median (IQR)                                          | 71.0(62.0-80.0)       | 72.5(65.3-81.8)    | 70.0(61.5-78.5)      |
| Female, n (%)                                                     | 103(44.2)             | 26 (46.4)          | 77(43.5)             |
| <b>Vascular risk factors, n (%)</b>                               |                       |                    |                      |
| Hypertension                                                      | 156(66.9)             | 43(76.8)           | 113(63.8)            |
| Diabetes mellitus                                                 | 61(26.1)              | 18(32.1)           | 43 (24.3)            |
| Hyperlipidemia                                                    | 7(3.0)                | 3(5.4)             | 4(2.3)               |
| Coronary artery disease                                           | 25(10.7)              | 7(10.2)            | 18(12.5)             |
| Atrial fibrillation                                               | 87(37.3)              | 20(35.7)           | 67(37.9)             |
| Previous stroke or TIA                                            | 38(16.3)              | 10(17.9)           | 28(15.8)             |
| Smoking, n (%)                                                    | 50(21.4)              | 12(21.4)           | 38(21.5)             |
| Drinking, n (%)                                                   | 38(16.3)              | 9(16.1)            | 29(16.4)             |
| <b>Clinical data</b>                                              |                       |                    |                      |
| Systolic blood pressure, mmHg, median (IQR)                       | 139.5(123.5-160.0)    | 141.0(127.0-169.8) | 139.0(123.0-159.5)   |
| Diastolic blood pressure, mmHg, median (IQR)                      | 79.0(68.5-90.0)       | 80.7(70.0-96.0)    | 78.0(67.0-90.0)      |
| NIHSS at baseline, score, median (IQR)                            | 15.0(11.0-18.5)       | 16.0(12.0-19.5)    | 14.0(11.0-18.5)      |
| Interval from onset to treatment, median (IQR)                    | 355.0(270.0-500.0)    | 357.5(270.0-555.0) | 355.0(260.0-476.5)   |
| Interval from groin puncture to recanalization, min, median (IQR) | 65.0(38.5-105.0)      | 76.5(45.3-137.5)   | 60.0(37.0-100.0)     |
| <b>Cause of stroke, n (%)</b>                                     |                       |                    |                      |
| Atherosclerotic                                                   | 93(39.9)              | 22(39.3)           | 71 (40.1)            |
| Cardioembolic                                                     | 107(45.9)             | 27(48.2)           | 80(45.2)             |
| Others                                                            | 33(14.2)              | 7(12.5)            | 26(14.7)             |
| Intravenous thrombolysis, n (%)                                   | 62(26.6)              | 13(23.2)           | 49(27.7)             |
| <b>Endovascular therapy</b>                                       |                       |                    |                      |
| Tirofiban, n (%)                                                  | 179(76.8)             | 41(73.2)           | 138(78.0)            |
| sICH, n (%)                                                       | 65(27.8)              | 17(30.4)           | 48(27.1)             |
| Recanalization, n (%)                                             | 215(92.2)             | 46(82.1)           | 169(95.5)            |
| <b>Lesion location, n (%)</b>                                     |                       |                    |                      |
| Anterior circulation                                              | 145(62.2)             | 29(51.8)           | 116(65.5)            |
| Posterior circulation                                             | 88(37.7)              | 27(48.2)           | 61(34.5)             |
| <b>Procedural modes, n (%)</b>                                    |                       |                    |                      |
| Aspiration only                                                   | 12(5.1)               | 1(1.8)             | 11 (6.2)             |
| Stent retriever only                                              | 153(65.6)             | 35(62.5)           | 118(66.7)            |
| Stent retriever/aspiration with rescue therapy                    | 68(29.1)              | 20(35.7)           | 48(27.1)             |
| Passes of stent retriever, median (IQR)                           | 2.0(1.0-3.0)          | 2.0(1.0-3.0)       | 2.0(1.0-3.0)         |
| <b>Laboratory data, median (IQR)</b>                              |                       |                    |                      |
| Platelets, $\mu\text{mol/L}$                                      | 178.0(151.0-213.0)    | 176.0(146.8-226.0) | 178.0(152.0-211.0)   |
| Serum creatinine, $\mu\text{mol/L}$                               | 65.0(55.0-78.5)       | 68.5(54.0-82.8)    | 65.0(56.0-76.0)      |
| Blood glucose, mmol/L                                             | 6.7(5.4-8.8)          | 7.9(6.0-11.0)      | 6.4(5.3-7.6)         |
| Total cholesterol, mmol/L                                         | 4.1(3.5-5.0)          | 4.1(3.4-4.9)       | 4.1(3.6-5.0)         |
| Triglyceride, mmol/L                                              | 1.0(0.7-1.3)          | 1.2(0.8-1.4)       | 0.9(0.7-1.3)         |
| High density lipoprotein, mmol/L                                  | 1.2(1.0-1.4)          | 1.1(0.9-1.4)       | 1.2(1.0-1.4)         |
| Low density lipoprotein, mmol/L                                   | 2.4(1.9-3.1)          | 2.3(1.9-3.0)       | 2.4(1.9-3.2)         |
| UA, $\mu\text{mol/L}$                                             | 314.0(241.5-383.0)    | 319.5(255.5-387.3) | 340.0(257.5-411.5)   |
| Glycated hemoglobin, mmol/L                                       | 6.0(5.6-6.7)          | 6.2(5.7-7.5)       | 5.9(5.6-6.5)         |
| Homocysteine, $\mu\text{mol/L}$                                   | 12.0(10.1-15.2)       | 12.0(9.8-17.3)     | 12.0(10.3-14.9)      |

Data are presented as median (IQR) or number (%). Abbreviations: IQR, interquartile range; TIA, Transient cerebral ischemia; NIHSS, National Institute of Health stroke scale; sICH, symptomatic intracranial hemorrhage; UA, Uric Acid.

**Supplement Table S2. The p-values of pairwise comparisons of AUCs on the testing set for different models with the Delong test**

| Model | RF     | SVM    | XGBoost |
|-------|--------|--------|---------|
| LR    | <0.001 | 0.898  | <0.001  |
| RFC   |        | <0.001 | 0.424   |
| SVM   |        |        | <0.001  |

The significant difference between AUCs is defined as p-value < 0.05. Abbreviations: AUC, the area under receiver operating characteristic curve; LR, logistic regression; RF, random forest; SVM, support vector machine; XGBoost, extreme gradient boosting
